# Supplementary material
Source: PubMed Central journal article supplement (PMC6170773)
Supplement: rsif20180514supp2.pdf [file rsif20180514supp2.pdf]

## Supplementary text S2

### *Stochastic block model for rich cores in single-layer networks*

Suppose we have  $N$  nodes and we want to construct a single-layer network from which we can identify a partition into two sets: a core of size  $N_c < N$  and a periphery of size  $N_p = N - N_c$ . Here we test the performance of the single-layer algorithm to detect rich cores [1] on a simple stochastic block model.

Let us consider  $N$  nodes from which  $N_c$  drawn at random are chosen to be part of the network core, whereas the remaining  $N_p$  are part of the periphery. A network with core-periphery structure is such that its adjacency matrix can be decomposed into four different blocks: a dense diagonal block encoding information on core-core links, a sparser diagonal block describing links among peripheral nodes, and two off-diagonal blocks encoding core-periphery edges.

In our block model, we connect two nodes with probability  $\rho_1$  if they both belong to the core, with probability  $\rho_2$  if one of them belongs to the core and one to the periphery, and with probability  $\rho_3$  if they both belong to the periphery,  $\rho_1 \geq \rho_2 \geq \rho_3$ . Given a stochastic realization of the block model, we can extract the rich core of the network and compare it with the ground-truth, i.e. the set of nodes originally labeled as core nodes. In particular, we can test the accuracy of the algorithm for different choice of the parameters  $\rho_1$ ,  $\rho_2$  and  $\rho_3$ .

Given the three probabilities, the expected total number of edges connecting two core nodes is  $K_{cc} = \rho_1[(N_c - 1) * N_c/2]$ , the expected total number of edges connecting two peripheral nodes is  $K_{pp} = \rho_3[(N - N_c - 1) * (N - N_c)/2]$ , and the expected total number of edges connecting a node in the core and a node in the periphery  $K_{cp} = \rho_2[N_c * (N - N_c)]$ . The total number of links is  $K = K_{cc} + K_{cp} + K_{pp}$ .

In the case  $\rho_1 = \rho_2 = \rho_3 = \rho$  the nodes are statistically indistinguishable from a structural point of view, the network lacks a core-periphery structure and specifying the value of  $\rho$  simply sets the expected average degree of the network  $\langle k \rangle = N\rho$ . For instance, for  $N = 250$  and  $\rho = 0.04$  we obtain  $\langle k \rangle = 10$  and  $K = 1250$ . Of the different blocks of the adjacency matrix, the exact value of the density of the block encoding links between core and periphery nodes does not play a significant role [2]. For such a reason here we set  $\rho_2 = 0.04$ , and study the core-periphery structure of the network as a function of  $\rho_1$ , with  $\rho_1 > \rho_2$ . The higher the value of  $\rho_1$ , the stronger the core-periphery structure of the system. In order to control for the density of the network, as we increases  $\rho_1$  we have to opportunately decrease the value of  $\rho_3$ . The average degree  $\langle k \rangle$  can be kept fixed by setting

$$\rho_3 = \frac{2}{(N_p) * (N_p - 1)} \left( K - K_{cc} - K_{cp} \right). \quad (1)$$

In our case with  $N = 250$  and  $\langle k \rangle = 10$ , we have  $K = 1250$  whereas  $K_{cc}$  and  $K_{cp}$  are set once we fix the core size  $N_c$  and the value of  $\rho_1$ . In Fig. 1 we show the average Jaccard index  $J$  computed for the ground-truth partition and the partition extracted

by the algorithm on the stochastic realizations of the network as a function of different values of  $\rho_1$  for different core size.

As shown,  $J$  increases quickly until  $\rho_1 = 0.2$  and only mildly after this point. This indicates that  $\rho_1 = 0.2$ , corresponding to a value of  $\rho_3 = 0.03$ , can be considered as the smallest density of the core-core block at which the core-periphery structure of the network is sufficiently well-defined. For this reason, in the stochastic block model for multiplex networks with different values of core similarity  $S_c$  described in Fig. ?? of the main text, where we have  $N = 250$  and  $N_c = 50$  we set  $\rho_1 = 0.2$ .

Given the set of parameters  $\rho_1$ ,  $\rho_2$  and  $\rho_3$  we can also compute the average degree  $\langle k_c \rangle$  of core nodes

$$\langle k_c \rangle = \rho_1(N_c - 1) + \rho_2(N_p), \quad (2)$$

the average degree  $\langle k_p \rangle$  of the peripheral nodes

$$\langle k_p \rangle = \rho_3(N_p - 1) + \rho_2(N_c). \quad (3)$$

so that we have

$$\langle k \rangle = \frac{N_c \langle k_c \rangle + N_p \langle k_p \rangle}{N}. \quad (4)$$

In Fig. 2 we show the average Jaccard index  $J$  computed for the ground-truth partition and the partition extracted by the algorithm as a function of  $\langle k_c \rangle / \langle k_p \rangle$ . The Jaccard index  $J$  is defined as

$$J = \frac{I_c^{[\alpha\beta]}}{N_c^{[\alpha]} + N_c^{[\beta]} - I_c^{[\alpha\beta]}}, \quad (5)$$

where  $N_c^{[\alpha]}$  is the number of core nodes at layer  $\alpha$ ,  $N_c^{[\beta]}$  is the number of core nodes at layer  $\beta$  and  $I_c^{[\alpha\beta]}$  is the number of nodes that are part of the core at both layers  $\alpha$  and  $\beta$ .

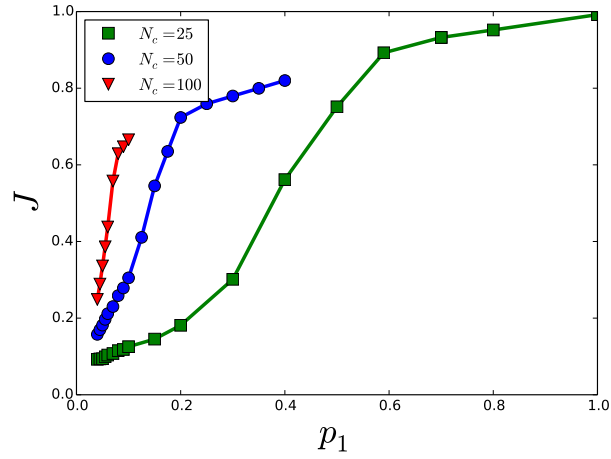

Figure 1: Jaccard index  $J$  for the groundtruth core-periphery partition and the partition obtained by the algorithm on realizations of the stochastic block model as a function of  $\rho_1$  and for different core sizes  $N_c$ .

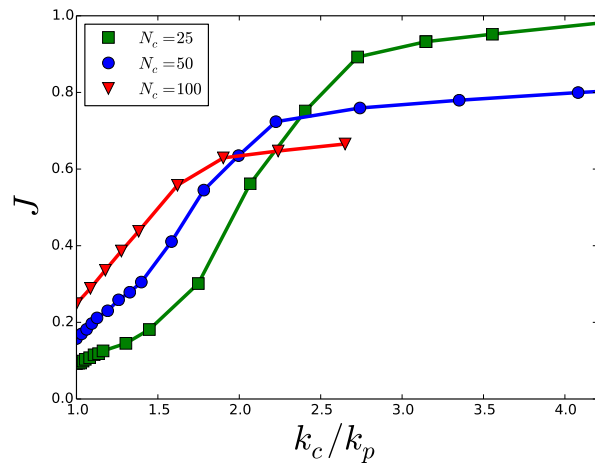

Figure 2: Jaccard index  $J$  for the ground-truth core-periphery partition and the partition obtained by the algorithm on realizations of the stochastic block model as a function of  $\langle k_c \rangle / \langle k_p \rangle$  and for different core sizes  $N_c$ .

## References

- [1] A. Ma, R. J. Mondrag, Rich-Cores in Networks, PLOS ONE 10 (3) (2015) e0119678. doi:10.1371/journal.pone.0119678.

- [2] S. P. Borgatti, M. G. Everett, Models of core/periphery structures, *Social Networks* 21 (4) (2000) 375–395. doi:10.1016/S0378-8733(99)00019-2.
