# Supplementary material
Source: PubMed Central journal article supplement (PMC6170773)
Supplement: rsif20180514supp3.pdf [file rsif20180514supp3.pdf]

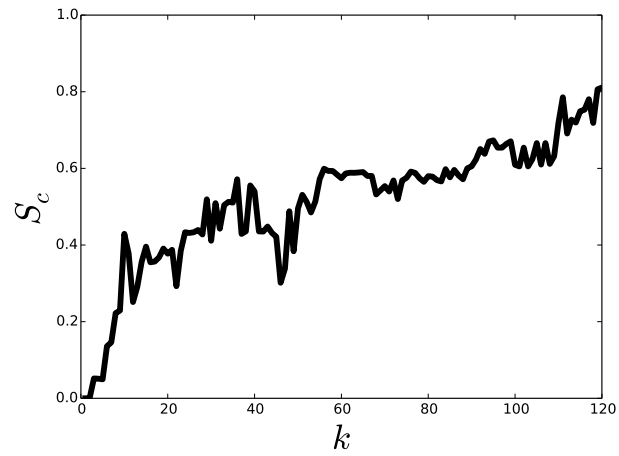

Figure S1: Core similarity  $S_c$  for the structural and functional brain networks thresholded at different values of average degree  $\langle k \rangle$ .
