# Supplementary material
Source: PubMed Central journal article supplement (PMC6170773)
Supplement: rsif20180514supp6.pdf [file rsif20180514supp6.pdf]

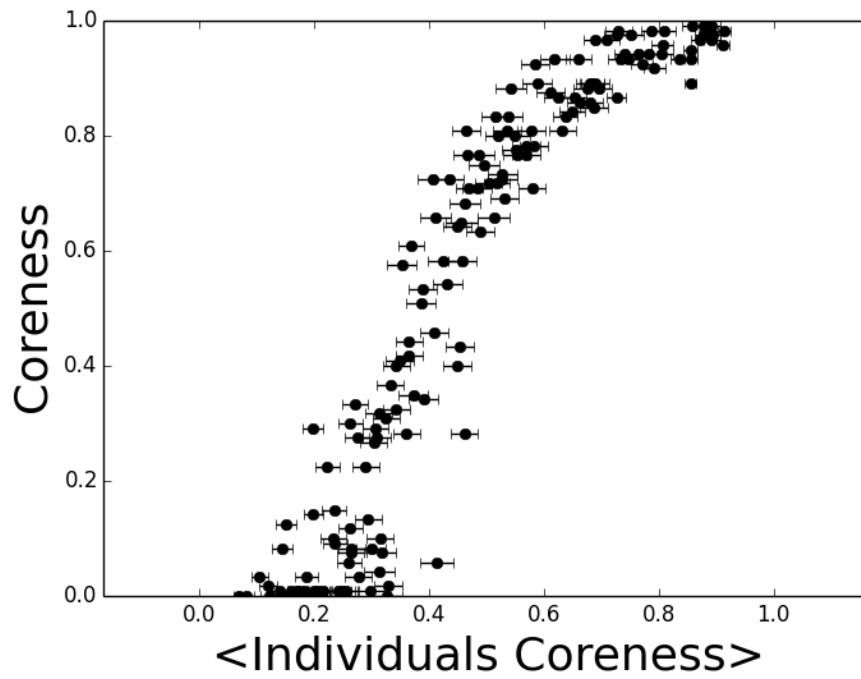

Figure S4: Coreness of the average as a function of average of the coreness. Each point corresponds to a brain region. On the y-axis we show the multiplex coreness of the group-averaged brain networks. On the x-axis we show the average of the multiplex coreness extracted from each individual. Error bars stand for standard error means. The corresponding Spearman's correlation coefficient is  $\rho_s = 0.960$ ,  $p = 2.72 \times 10^{-88}$ .
