# Supplementary material
Source: PubMed Central journal article supplement (PMC6170773)
Supplement: rsif20180514supp7.pdf [file rsif20180514supp7.pdf]

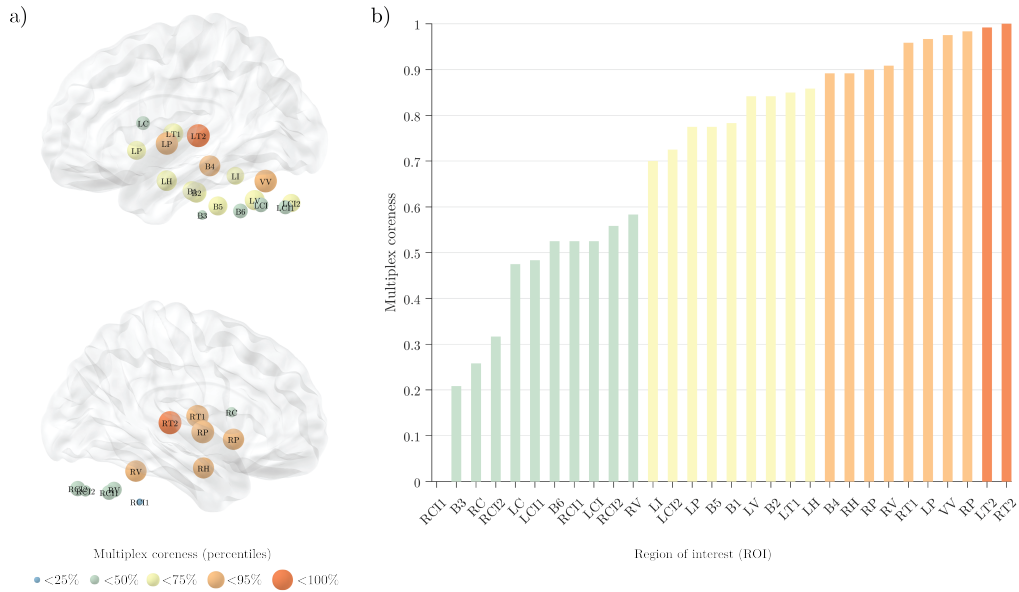

Figure S5: Panel a) shows the spatial position of the subcortical ROIs ( $n = 38$ ). The size and color of the nodes code for the percentiles associated to their coreness with respect to all the ROIs ( $n = 188$ ). Acronym : B = Brain stem; C = Caudate; CI = Crus; T = Thalamus; Pu = Putamen; Pa = Pallidum; V = Visual; H = Hippocampus. L = Left hemisphere; R = Right hemisphere; The number in the acronyms indicate the longitudinal position of ROIs. Panel b) shows the coreness of each subcortical ROI. The color codes for the percentile associated to their coreness with respect to all the other ROIs.
