# Supplementary material
Source: PubMed Central journal article supplement (PMC6170773)
Supplement: rsif20180514supp8.pdf [file rsif20180514supp8.pdf]

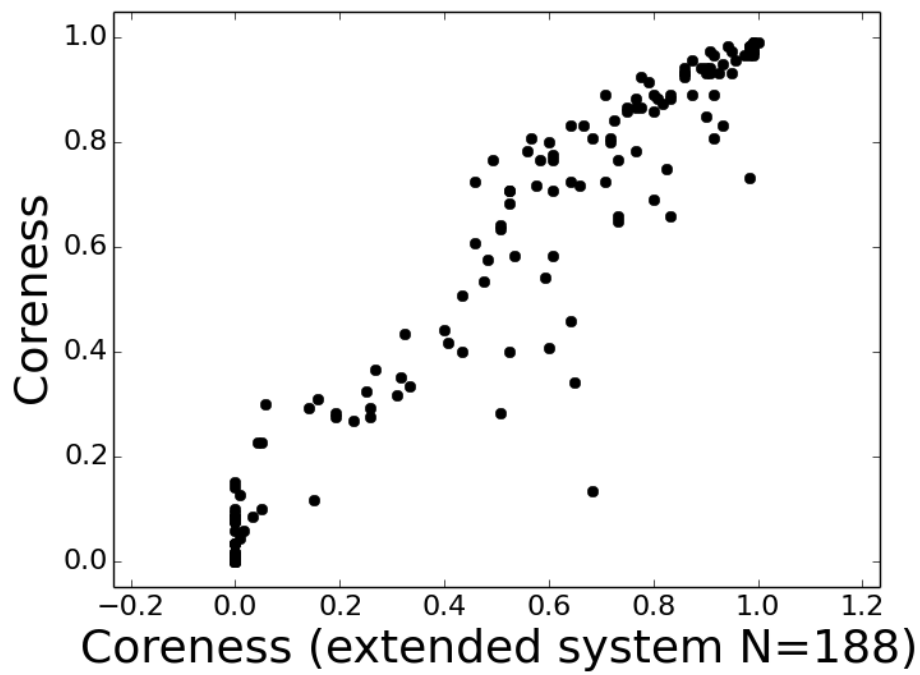

Figure S6: Scatterplot of the multiplex coreness of each ROI computed from brain networks with and without and without subcortical regions. The corresponding Spearman's correlation coefficient is  $\rho_s = 0.95$ , with a  $p = 1.7 \times 10^{-78}$ .
