# Supplementary material
Source: PubMed Central journal article supplement (PMC6170773)
Supplement: rsif20180514supp9.pdf [file rsif20180514supp9.pdf]

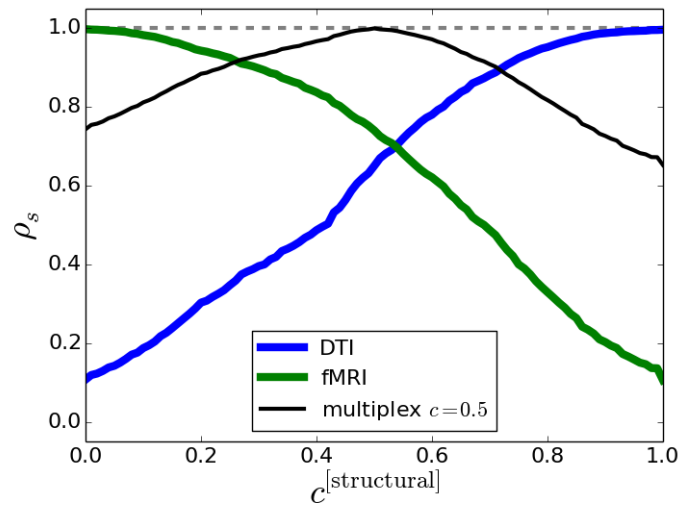

Figure S7: Sensitivity analysis for the multiplex brain coreness. We considered different coefficients  $c^{[\alpha]}$  for the structural and functional layer. Specifically,  $c^{[\text{structural}]} \in [0, 1]$  with  $c^{[\text{functional}]} = 1 - c^{[\text{structural}]}$ . We analyzed the similarity (in terms of Spearman correlation) between the unbiased multiplex coreness and the structural (DTI), functional (fMRI) and multiplex coreness as a function of  $c^{[\text{structural}]}$ . The multiplex coreness is relatively stable across different coefficients around the unbiased case  $c^{[\text{structural}]} = c^{[\text{functional}]} = 0.5$  (black curve); In addition,  $c^{[\text{structural}]} = 0.5$  leads to a multiplex coreness which is slightly more similar to the functional coreness (green curve), highlighting that the multiplex core is more than the sum of the cores at the different layers.
