# Supplementary material
Source: PubMed Central journal article supplement (PMC6170773)
Supplement: rsif20180514supp10.pdf [file rsif20180514supp10.pdf]

| Layer     | $N_c$ |
|-----------|-------|
| 1         | 17    |
| 2         | 17    |
| 3         | 12    |
| Multiplex | 12    |

| Layer     | Layer | $I_C$ |
|-----------|-------|-------|
| 1         | 2     | 6     |
| 1         | 3     | 5     |
| 2         | 3     | 6     |
| Multiplex | 1     | 10    |
| Multiplex | 2     | 8     |
| Multiplex | 3     | 7     |

Table S1: In the left table we report the size  $N_c$  of the cores of the three layers (mutual trust, common operations, exchanged communications) of the Top Noordin Terrorists network and of the multiplex core shown in Fig. 1 of the main text. In the right table we report the number of common core nodes  $I_c$  belonging to the different pairs of layers. The network is characterized by a core similarity  $S_c = 0.38$  ( $S_c^{[1]} = 0.32$ ,  $S_c^{[2]} = 0.35$ ,  $S_c^{[1]} = 0.46$ . See Eq. 3 in the main text). We also report the number of common core nodes for the multiplex and each layer.
