# Supplementary material
Source: PubMed Central journal article supplement (PMC6170773)
Supplement: rsif20180514supp11.pdf [file rsif20180514supp11.pdf]

| ROI label                               | Abbrev. | ROI label                                | Abbrev. |
|-----------------------------------------|---------|------------------------------------------|---------|
| Left Angular                            | LAG     | Right Central Opercular                  | RCOC    |
| Left Central Opercular                  | LCOC    | Right Cingulate anterior 1               | RCa1    |
| Left Cingulate anterior                 | LCa     | Right Cingulate anterior 2               | RCa2    |
| Left Cingulate posterior                | LCp     | Right Cingulate posterior 1              | RCp1    |
| Left Frontal Medial                     | LFMC    | Right Cingulate posterior 2              | RCp2    |
| Left Frontal Orbital 1                  | LFOC1   | Right Frontal Orbital                    | RFOC    |
| Left Frontal Orbital 2                  | LFOC2   | Right Frontal Pole 1                     | RFP1    |
| Left Frontal Pole 1                     | LFP1    | Right Frontal Pole 10                    | RFP10   |
| Left Frontal Pole 10                    | LFP10   | Right Frontal Pole 2                     | RFP2    |
| Left Frontal Pole 2                     | LFP2    | Right Frontal Pole 3                     | RFP3    |
| Left Frontal Pole 3                     | LFP3    | Right Frontal Pole 4                     | RFP4    |
| Left Frontal Pole 4                     | LFP4    | Right Frontal Pole 5                     | RFP5    |
| Left Frontal Pole 5                     | LFP5    | Right Frontal Pole 6                     | RFP6    |
| Left Frontal Pole 6                     | LFP6    | Right Frontal Pole 7                     | RFP7    |
| Left Frontal Pole 7                     | LFP7    | Right Frontal Pole 8                     | RFP8    |
| Left Frontal Pole 8                     | LFP8    | Right Frontal Pole 9                     | RFP9    |
| Left Frontal Pole 9                     | LFP9    | Right Heschls                            | RHG     |
| Left Inferior Frontal pars triangularis | LIFGpt  | Right Inferior Frontal pars triangularis | RIFGpt  |
| Left Inferior Temporal posterior 1      | LITGp1  | Right Inferior Temporal posterior 1      | RITGp1  |
| Left Inferior Temporal posterior 2      | LITGp2  | Right Inferior Temporal posterior 2      | RITGp2  |
| Left Inferior Temporal occipital        | LITGt   | Right Inferior Temporal occipital        | RITGt   |
| Left Insular 1                          | LIC1    | Right Insular 1                          | RIC1    |
| Left Insular 2                          | LIC2    | Right Insular 2                          | RIC2    |
| Left Insular 3                          | LIC3    | Right Intracalcarine                     | RICL    |
| Left Lateral Occipital inferior 1       | LLOCi1  | Right Juxtapositional Lobule             | RJL     |
| Left Lateral Occipital inferior 2       | LLOCi2  | Right Lateral Occipital inferior 1       | RLOCi1  |
| Left Lateral Occipital superior 1       | LLOCs1  | Right Lateral Occipital inferior 2       | RLOCi2  |
| Left Lateral Occipital superior 2       | LLOCs2  | Right Lateral Occipital inferior 3       | RLOCi3  |
| Left Lateral Occipital superior 3       | LLOCs3  | Right Lateral Occipital superior 1       | RLOCs1  |
| Left Lateral Occipital superior 4       | LLOCs4  | Right Lateral Occipital superior 2       | RLOCs2  |
| Left Lateral Occipital superior 5       | LLOCs5  | Right Lateral Occipital superior 3       | RLOCs3  |
| Left Lateral Occipital superior 6       | LLOCs6  | Right Lateral Occipital superior 4       | RLOCs4  |
| Left Lingual 1                          | LLG1    | Right Lateral Occipital superior 5       | RLOCs5  |
| Left Lingual 2                          | LLG2    | Right Lateral Occipital superior 6       | RLOCs6  |
| Left Middle Frontal 1                   | LMFG1   | Right Lingual 1                          | RLG1    |
| Left Middle Frontal 2                   | LMFG2   | Right Lingual 2                          | RLG2    |
| Left Middle Frontal 3                   | LMFG3   | Right Middle Frontal 1                   | RMFG1   |
| Left Middle Temporal anterior           | LMTGa   | Right Middle Frontal 2                   | RMFG2   |
| Left Middle Temporal posterior 1        | LMTGp1  | Right Middle Frontal 3                   | RMFG3   |
| Left Middle Temporal posterior 2        | LMTGp2  | Right Middle Frontal 4                   | RMFG4   |
| Left Middle Temporal occipital          | LMTGt   | Right Middle Temporal anterior           | RMTGa   |
| Left Occipital Fusiform 1               | LOFG1   | Right Middle Temporal posterior          | RMTGp   |
| Left Occipital Fusiform 2               | LOFG2   | Right Middle Temporal occipital 1        | RMTGt1  |
| Left Occipital Pole 1                   | LOP1    | Right Middle Temporal occipital 2        | RMTGt2  |
| Left Occipital Pole 2                   | LOP2    | Right Occipital Fusiform                 | ROFG    |
| Left Occipital Pole 3                   | LOP3    | Right Occipital Pole 1                   | ROP1    |
| Left Occipital Pole 4                   | LOP4    | Right Occipital Pole 2                   | ROP2    |
| Left Paracingulate 1                    | LPC1    | Right Occipital Pole 3                   | ROP3    |
| Left Paracingulate 2                    | LPC2    | Right Paracingulate 1                    | RPC1    |
| Left Parahippocampal posterior          | LPHp    | Right Paracingulate 2                    | RPC2    |
| Left Parietal Operculum                 | LPOC    | Right Parahippocampal posterior          | RPHp    |
| Left Planum Temporale 1                 | LPT1    | Right Parietal Operculum 1               | RPOC1   |
| Left Planum Temporale 2                 | LPT2    | Right Parietal Operculum 2               | RPOC2   |
| Left Postcentral 1                      | LCGp1   | Right Planum Polare                      | RPP     |
| Left Postcentral 2                      | LCGp2   | Right Postcentral 1                      | RCGp1   |
| Left Postcentral 3                      | LCGp3   | Right Postcentral 2                      | RCGp2   |
| Left Postcentral 4                      | LCGp4   | Right Postcentral 3                      | RCGp3   |
| Left Precentral 1                       | LCGa1   | Right Postcentral 4                      | RCGp4   |
| Left Precentral 2                       | LCGa2   | Right Precentral 1                       | RCGa1   |
| Left Precentral 3                       | LCGa3   | Right Precentral 2                       | RCGa2   |
| Left Precentral 4                       | LCGa4   | Right Precentral 3                       | RCGa3   |
| Left Precuneous 1                       | LPCU1   | Right Precuneous 1                       | RPCU1   |
| Left Precuneous 2                       | LPCU2   | Right Precuneous 2                       | RPCU2   |
| Left Subcallosal                        | LSC     | Right Precuneous 3                       | RPCU3   |
| Left Superior Frontal 1                 | LSFG1   | Right Superior Frontal 1                 | RSFG1   |
| Left Superior Frontal 2                 | LSFG2   | Right Superior Frontal 2                 | RSFG2   |
| Left Superior Frontal 3                 | LSFG3   | Right Superior Parietal Lobule 1         | RSPL1   |
| Left Superior Parietal Lobule 1         | LSPL1   | Right Superior Parietal Lobule 2         | RSPL2   |
| Left Superior Parietal Lobule 2         | LSPL2   | Right Superior Temporal posterior 1      | RSTGp1  |
| Left Supramarginal anterior             | LSGa    | Right Superior Temporal posterior 2      | RSTGp2  |
| Left Supramarginal posterior            | LSMp    | Right Supramarginal anterior             | RSMa    |
| Left Temporal Fusiform anterior         | LTFCa   | Right Supramarginal posterior            | RSGp    |
| Left Temporal Fusiform posterior        | LTFCp   | Right Temporal Fusiform anterior         | RTFCa   |
| Left Temporal Occipital Fusiform 1      | LTOFC1  | Right Temporal Fusiform posterior 1      | RTFCp1  |
| Left Temporal Occipital Fusiform 2      | LTOFC2  | Right Temporal Fusiform posterior 2      | RTFCp2  |
| Left Temporal Pole 1                    | LTP1    | Right Temporal Occipital Fusiform        | RTOFC   |
| Left Temporal Pole 2                    | LTP2    | Right Temporal Pole 1                    | RTP1    |
| Left Temporal Pole 3                    | LTP3    | Right Temporal Pole 2                    | RTP2    |
| Right Angular                           | RAG     | Right Temporal Pole 3                    | RTP3    |

Table S2: Full list of Regions of Interest (ROIs) and abbreviations. Numbers denote the relative position within a macro area, i.e. higher values stand for more posterior ROIs.
